# Supplementary material
Source: MDPI journal article supplement (https://www.mdpi.com/1999-4907/7/3/63)
Supplement: s2 [file s2]

## Sheet: Distance x spp
Fragment	Matrix	Species	−5	0	5	10	15	20	25	30	35	40
Arenillo	Pasture	Epidendrum paniculatum	0	9	0	5	0	0	0	0	0	0
Arenillo	Pasture	Cyrtochilum aemulum	0	3	3	0	0	0	0	0	0	0
Arenillo	Pasture	Prescottia stachyodes	0	0	2	3	3	0	0	0	0	0
Arenillo	Regeneracion	Epidendrum paniculatum	0	0	0	0	3	5	0	0	0	5
Arenillo	Regeneracion	Cyrtochilum aemulum	4	0	0	0	0	7	0	3	0	3
Arenillo	Regeneracion	Oncidium chrysomorphum	0	3	0	0	0	7	0	0	0	0
Arenillo	Regeneracion	Epidendrum diothonea	0	0	3	0	0	0	0	0	0	0
Arenillo	Regeneracion	Psilochilus vallecaucanae	0	0	2	0	0	0	0	0	0	0
Arenillo	Regeneracion	Dichae richii	0	0	0	5	0	0	10	0	0	0
Arenillo	Regeneracion	Masdevallia picturata	0	0	0	0	0	0	0	0	0	10
Dapa	Pasture	Acronia cordata	0	0	0	0	0	10	0	0	0	4
Dapa	Pasture	Ancipitia crocodiliceps	0	0	0	45	98	32	0	0	0	0
Dapa	Pasture	Dichae pendula	0	0	0	30	0	0	0	0	0	0
Dapa	Pasture	Dichae richii	0	0	0	0	10	0	0	0	0	0
Dapa	Pasture	Dichae morrissii	0	0	0	0	0	5	9	0	0	12
Dapa	Pasture	Dracula chimaera	0	0	1	0	0	0	0	0	0	0
Dapa	Pasture	Elleanthus vinosus	0	10	12	17	178	18	28	40	25	0
Dapa	Pasture	Epidendrum yumböense	0	8	3	1	0	0	0	0	0	0
Dapa	Pasture	Epidendrum lacustre	0	2	0	0	0	0	0	0	0	0
Dapa	Pasture	Epidendrum nora-mesae	0	24	6	8	0	0	59	20	25	26
Dapa	Pasture	Erythrodes peruviana	0	0	0	0	0	0	5	20	12	0
Dapa	Pasture	Lepanthes elata	0	0	0	0	0	20	0	0	0	0
Dapa	Pasture	Lepanthes foreroi	0	0	0	0	0	0	0	40	0	0
Dapa	Pasture	Lepanthes manabina	0	0	0	0	0	0	5	0	6	0
Dapa	Pasture	Malaxis moritzii	0	0	0	0	0	0	1	0	0	0
Dapa	Pasture	Maxillaria longissima	0	0	0	0	0	6	0	0	0	0
Dapa	Pasture	Maxillaria acuminata	0	3	0	0	0	0	0	0	0	0
Dapa	Pasture	Oncidium chrysomorphum	0	6	6	0	0	0	3	0	0	0
Dapa	Pasture	Oncidium chrysomorphum	0	20	0	0	0	0	0	0	0	0
Dapa	Pasture	Pleurothallis sp1	0	38	17	31	76	0	0	0	0	0
Dapa	Pasture	Pleurothallis manicosa	0	0	0	12	25	0	0	0	0	0
Dapa	Pasture	Acronia platysepala	0	0	0	0	0	0	25	0	0	0
Dapa	Pasture	Acronia scabrilinguis	0	0	0	36	20	0	0	0	0	0
Dapa	Pasture	Prescottia stachyodes	0	0	6	0	0	0	0	0	0	0
Dapa	Pasture	Prosthechea vespa	0	0	0	0	6	12	0	0	0	0
Dapa	Pasture	Scaphosepalum odontochilum	0	0	0	20	0	0	51	0	0	16
Dapa	Pasture	Scaphyglottis punctulata	0	0	0	0	42	30	0	0	0	0
Dapa	Pasture	Schlimmia trifida	0	15	15	0	0	0	95	0	0	0
Dapa	Pasture	Stelis	0	79	0	0	0	0	0	0	0	0
Dapa	Pasture	Trychosalpinx arbuscula	0	7	0	122	0	0	0	0	0	0
Dapa	Pasture	Trychosalpinx intricata	0	0	0	40	0	0	0	0	0	0
Dapa	Regeneracion	Ancipitia crocodiliceps	0	8	0	0	0	0	0	0	0	0
Dapa	Regeneracion	Cyrtochilum exasperatum	0	0	0	0	0	10	0	0	0	0
Dapa	Regeneracion	Dichae hystricina	0	2	0	0	0	0	0	2	0	2
Dapa	Regeneracion	Dichae morrissii	0	0	20	0	0	0	0	0	0	0
Dapa	Regeneracion	Dracula chimaera	0	10	0	0	3	2	4	2	24	40
Dapa	Regeneracion	Elleanthus lancifolius	20	9	0	0	0	0	0	3	0	0
Dapa	Regeneracion	Epidendrum nora-mesae	0	3	0	2	4	0	20	25	24	0
Dapa	Regeneracion	Lepanthes declivis	0	0	0	0	0	0	0	0	0	10
Dapa	Regeneracion	Lepanthes dapaënsis	0	0	0	2	0	0	0	0	0	0
Dapa	Regeneracion	Lepanthes elata	0	7	0	0	4	4	0	0	8	0
Dapa	Regeneracion	Lepanthes ortiziana	0	0	0	0	0	10	3	0	0	0
Dapa	Regeneracion	Lepanthes quadricornis	0	35	0	0	0	0	0	0	0	0
Dapa	Regeneracion	Lepanthes aciculifolia	0	0	0	0	0	0	0	0	0	2
Dapa	Regeneracion	Maxillaria brunnea	0	1	0	0	0	0	0	0	0	3
Dapa	Regeneracion	Maxillaria acuminata	35	0	0	0	0	0	0	0	0	0
Dapa	Regeneracion	Bollea coelestis	0	0	0	0	0	0	0	0	2	0
Dapa	Regeneracion	Oncidium adelaidea	0	0	0	0	0	0	1	1	0	0
Dapa	Regeneracion	Pleurothallis platysepala	0	9	0	0	0	0	0	0	0	0
Dapa	Regeneracion	Pleurothallis ruscifolia	0	10	0	0	0	0	0	0	0	0
Dapa	Regeneracion	Pleurothallis scabrilinguis	8	26	0	0	0	10	0	0	0	0
Dapa	Regeneracion	Pleurothallis platysepala	0	0	0	0	0	20	0	7	0	0
Dapa	Regeneracion	Ponthieva elata	0	0	0	0	4	5	5	0	0	0
Dapa	Regeneracion	Ponthieva villosa	0	0	0	0	0	0	0	0	3	0
Dapa	Regeneracion	Scaphosepalum odontochilum	0	23	16	0	30	30	15	0	0	50
Dapa	Regeneracion	Stelis alba	10	27	0	5	5	28	0	35	10	50
Dapa	Regeneracion	Stelis flexuosa	0	9	0	0	0	15	0	0	0	0
Dapa	Regeneracion	Trychosalpinx chamaelepanthes	0	130	32	0	12	0	0	0	0	0
Roldanillon	Pasture	Microchilus queremalensis	20	40	0	0	0	0	0	0	0	0
Roldanillon	Pasture	Acianthera casapensis	0	0	0	0	4	0	0	0	0	0
Roldanillon	Pasture	Acianthera sicaria	0	30	15	0	35	0	0	33	6	0
Roldanillon	Pasture	Cyrtochilum meirax	0	0	0	0	0	3	0	0	0	0
Roldanillon	Pasture	Dichae morrissii	0	6	0	0	0	7	0	0	0	0
Roldanillon	Pasture	Epidendrum sp	0	0	0	0	4	0	0	0	0	0
Roldanillon	Pasture	Epidendrum leucochilum	0	0	0	4	0	0	0	0	0	0
Roldanillon	Pasture	Epidendrum kolanowskae	0	0	0	0	3	0	0	0	0	0
Roldanillon	Pasture	Kefersteinia tolimensis	0	0	0	0	0	2	0	0	0	0
Roldanillon	Pasture	Pleurothallis 2	0	0	0	35	0	0	0	0	0	0
Roldanillon	Pasture	Prescottia stachyodes	0	4	0	0	0	0	0	0	0	0
Roldanillon	Pasture	Stelis argentata	0	0	0	0	60	0	0	65	65	2
Roldanillon	Regeneracion	Acianthera casapensis	0	0	0	0	0	0	0	0	12	12
Roldanillon	Regeneracion	Acianthera sicaria	0	0	0	0	6	0	0	12	0	0
Roldanillon	Regeneracion	Cyrtochilum meirax	0	30	0	0	0	0	0	0	0	0
Roldanillon	Regeneracion	Cyrtochilum murinum	0	0	0	6	0	0	0	0	0	0
Roldanillon	Regeneracion	Elleanthus purpureus	0	0	0	35	0	0	0	0	0	0
Roldanillon	Regeneracion	Epidendrum sp	5	0	3	0	8	2	0	0	5	0
Roldanillon	Regeneracion	Epidendrum nocturnum	0	28	0	6	10	0	0	0	0	0
Roldanillon	Regeneracion	Epidendrum kolanowskae	0	0	0	0	6	0	0	23	0	0
Roldanillon	Regeneracion	Kefersteinia tolimensis	2	57	0	0	7	0	0	5	3	5
Roldanillon	Regeneracion	Malaxis excavata	0	0	0	12	0	0	3	5	5	5
Roldanillon	Regeneracion	Microchilus queremalensis	14	0	5	10	0	0	0	0	0	0
Roldanillon	Regeneracion	Stelis argentata	0	0	10	0	0	12	0	35	15	0
Sevilla	Pasture	Comparettia falcata	0	2	0	32	0	0	0	0	0	0
Sevilla	Pasture	Dichae humilis	0	0	0	6	0	0	0	0	0	0
Sevilla	Pasture	Epidendrum sp.nov.	0	0	0	40	0	0	0	0	0	0
Sevilla	Pasture	Michrochilus aspidogynoides	15	10	36	115	60	190	0	0	0	0
Sevilla	Pasture	Trizeuxys falcata	0	0	0	0	0	2	0	0	0	0
Sevilla	Regeneracion	Campylocentrum micranthum	0	6	0	0	0	0	0	0	0	0
Sevilla	Regeneracion	Cyrtochilum trifurcatum	0	0	0	0	0	2	0	0	0	0
Sevilla	Regeneracion	Dichae muricata	0	0	0	0	0	0	0	6	2	0
Sevilla	Regeneracion	Dichae muricata	0	0	0	0	0	0	0	0	0	18
Sevilla	Regeneracion	Dichae morrissii	0	0	0	7	0	0	0	0	6	0
Sevilla	Regeneracion	Elleanthus formosus	0	0	60	0	0	0	0	0	0	45
Sevilla	Regeneracion	Epidendrum geminiflorum	0	0	0	0	0	0	0	0	0	22
Sevilla	Regeneracion	Masdevallia molosus	0	0	0	0	0	30	0	0	0	0
Sevilla	Regeneracion	Masdevallia picturata	0	0	0	0	0	10	0	0	0	0
Sevilla	Regeneracion	Maxillaria meridensis	0	0	0	0	2	0	0	0	0	0
Sevilla	Regeneracion	Maxillaria acuminata	0	0	0	0	10	0	0	0	10	0
Sevilla	Regeneracion	Oncidium pyramidale	0	0	0	0	0	0	0	3	0	0
Sevilla	Regeneracion	Neooreophillus dactylus	0	0	0	10	50	0	0	0	0	0
Sevilla	Regeneracion	Platystelis consobrina	0	0	5	50	60	10	0	0	0	0
Sevilla	Regeneracion	Pleurothallis 2	0	0	0	0	0	0	0	17	0	0
Sevilla	Regeneracion	Prescottia stachyodes	0	0	0	0	0	0	0	0	2	0
Sevilla	Regeneracion	Prosthechea grammatoglossa	0	0	7	0	0	0	0	0	0	0
Sevilla	Regeneracion	Stelis 2	0	0	12	0	0	0	0	0	0	0
Sevilla	Regeneracion	Xylobium corrugatum	0	0	0	20	0	0	0	0	0	0
Yotoco	Regeneration	Cryptocentrum latifolium	4	0	0	10	0	0	3	0	0	0
Yotoco	Regeneration	Dichaea pendula	3	122	22	0	20	0	80	0	0	0
Yotoco	Regeneration	Dichaea hystrichina	0	0	0	39	0	0	0	0	0	30
Yotoco	Regeneration	Elleanthus lupulinus	0	11	0	0	20	0	0	0	0	220
Yotoco	Regeneration	Epidendrum bispathulatum	0	0	0	0	32	2	0	0	0	46
Yotoco	Regeneration	Epidendrum summerhayesii	0	0	0	0	0	8	0	0	0	0
Yotoco	Regeneration	Epidendrum peperomia	0	0	0	0	0	0	0	2	0	0
Yotoco	Regeneration	Epidendrum dapa	5	0	0	0	0	0	0	0	0	0
Yotoco	Regeneration	Erythrodes peruviana	0	0	0	0	3	0	2	0	0	0
Yotoco	Regeneration	Lepanthes comun	1	17	31	76	0	0	0	80	0	0
Yotoco	Regeneration	Lepanthes estelaris	0	0	0	0	0	10	0	0	10	0
Yotoco	Regeneration	Lepanthes ortiziana	0	0	0	0	0	20	0	0	0	0
Yotoco	Regeneration	Maxillaria longicaulis	0	4	0	0	0	0	0	0	0	0
Yotoco	Regeneration	Maxillaria lawrenceana	0	2	0	2	0	0	0	0	0	0
Yotoco	Regeneration	Maxillaria sp	0	0	0	0	1	0	2	0	0	12
Yotoco	Regeneration	Oncidium pictum	0	0	0	2	0	0	0	5	0	0
Yotoco	Regeneration	Oncidium adelaidea	3	0	0	0	0	0	0	0	0	0
Yotoco	Regeneration	Neooreophillus sp.	0	0	0	0	0	12	0	0	0	0
Yotoco	Regeneration	Restrepia antennifera	10	105	31	0	60	5	45	3	0	0
Yotoco	Regeneration	Restrepia contorta	12	0	0	0	0	0	20	0	0	0
Yotoco	Regeneration	Scaphyglottis luckelii	0	0	4	0	0	0	15	0	0	30
Yotoco	Regeneration	Stelis spathulata	0	0	0	0	0	0	8	0	0	36
Yotoco	Regeneration	Masdevallia fritillina	0	0	0	0	0	0	0	6	0	0
Yotoco	Regeneration	Trychosalpinx chamaelepanthes	0	0	0	0	0	30	0	0	0	0
Yotoco	Regeneration	Trychosalpinx pergrata	3	0	0	0	0	40	0	0	0	0
Yotoco	Pasture	Oncidium adelaidea	0	0	0	0	0	0	1	0	0	1
Yotoco	Pasture	Epidendrum vicentinum	0	0	0	0	0	0	0	18	0	0
Yotoco	Pasture	Gongora gratulabunda	0	0	0	0	0	0	0	1	0	0
Yotoco	Pasture	Epidendrum bispathulatum	0	0	0	0	0	0	0	0	3	2
Yotoco	Pasture	Stelis 2	0	0	0	0	0	0	0	0	0	2
